# Supplementary material
Source: publisher figshare collection journal article supplement (https://karger.figshare.com/ndownloader/files/18736424)
Supplement: Supplementary file 1 [file 18736424]

Supplemental Table 1. Field of lymph node regions and association with pancreaticoduodenectomy or distal pancreatectomy.

|  | PD (Tumor located at pancreatic head) | DP (Tumor located at pancreatic body or tail) |
| --- | --- | --- |
| First region of the lymph node | 8a, 8p, 13a, 13b, 17a, 17b | 10, 11p, 11d, 18 |
| Second region of the lymph node | 5, 6, 12a, 12b, 12p, 14p, 14d | 7, 8a, 8p, 9, 14p, 14d |
| Third region of lymph node | 1, 2, 3, 4, 7, 9, 10, 11p, 11d, 15, 16a2, 16b1, 18 | 5,6, 12a, 12b, 12p, 13a, 13b, 15, 17a, 17b, 16a2, 16b1 |

(Revision of General Rules for the Study of Pancreatic Cancer (The 7th Edition))

PD, pancreaticoduodenectomy; DP, distal pancreatectomy.

D1 lymph node dissection：dissection the first region of the lymph node

D2 lymph node dissection：dissection the first and second region of the lymph node

D3 lymph node dissection：dissection the first, second and third region of the lymph node

Supplemental Table 2. Comparison with and without lymph node metastasis in patients with non-functioning pancreatic neuroendocrine tumor mesuring 10-19 mm in diameter.

| Prognostic factor | | With LNM  (n=3) | Without LNM (n=24) | P value |
| --- | --- | --- | --- | --- |
| Median age, (years, (range)) | | 60 (35-73) | 69 (39-70) | 0.56 |
| Sex | Female | 3 (100%) | 18 (75%) | 0.20 |
| Symptoms | Yes | 1 (33%) | 2 (8%) | 0.26 |
| Tumor number | 1 | 3 (100%) | 21 (87%) | 0.39 |
| Hereditary | Yes | 0 (0%) | 2 (8%) | 0.48 |
| Operative procedure | Limited | 1 (33%) | 15 (62%) | 0.34 |
| Major | 2 (67%) | 9 (38%) |  |
| Grade | G1 | 0 (0%) | 24 (100%) | <0.0001 |
| G2 | 3 (100%) | 0 (0%) |  |

LNM, lymph node metastasis

Supplemental Table 3. Comparison with and without adjuvant therapy in patients with non-functioning pancreatic neuroendocrine tumor

| Factor | | With adjuvant  therapy (n=5) | Without adjuvant therapy (n=69) | P value |
| --- | --- | --- | --- | --- |
| Median age, (years, (range)) | | 56 (39-71) | 59 (21-79) | 0.67 |
| Sex | Female | 5 (100%) | 41 (59%) | 0.026 |
| Symptoms | Yes | 1 (20%) | 10 (14%) | 0.75 |
| Tumor number | 1 | 5 (100%) | 56 (81%) | 0.16 |
| Hereditary | Yes | 0 (0%) | 10 (14%) | 0.22 |
| Operative procedure | Limited | 1 (20%) | 31 (45%) | 0.26 |
| Major | 4 (80%) | 38 (55%) |  |
| Grade | G1 | 2 (40%) | 58 (84%) | 0.034 |
| G2 | 3 (60%) | 11 (16%) |  |
| Lymph node metastasis | Yes | 4 (80%) | 9 (13%) | 0.0013 |
